# Supplementary material for: Neuronal octopamine signaling regulates mating-induced germline stem cell increase in female Drosophila melanogaster
Source: eLife. 2020 Oct 20;9:e57101. doi: 10.7554/eLife.57101 (PMC7591258; doi:10.7554/eLife.57101)
Supplement: Source data 1. — Raw data of numbers of GSC and other cells for Figure 1, Figure 1—figure supplement 1, Figure 1—figure supplement 3, Figure 2, Figure 2—figure supplement 1, Figure 3, Figure 4, Figure 4—figure supplement 1, Figure 5, Figure 5—figure supplement 1, Figure 6, and Figure 6—figure supplement 2. [file elife-57101-data1.xlsx]

## Sheet: Figure 1
Panel	genotype	mating	sample number	number of germaria				average # of GSCs	p Value		statistical test used
				3 GSCs	2 GSCs	1 GSC	0 GSC
Figure 1C	c587>+	virgin	106	26	69	11	0	2.14151	c587>+ Virgin vs c587>+ Mated	2.39584e-05	Wilcoxon sum rank test with Holm correction
		mated	108	53	54	1	0	2.48148
	c587>OctβR1-RNAi	virgin	125	26	89	10	0	2.128	c587>OctβR1-RNAi virgin vs c587>OctβR1-RNAi Mated	1.87233e-06
		mated	105	51	53	1	0	2.47619
	c587>OctβR2-RNAi	virgin	126	30	94	2	0	2.22222	c587>OctβR2-RNAi virgin vs c587>OctβR2-RNAi Mated	0.000227094
		mated	116	53	63	0	0	2.4569
	c587>OctβR3-RNAi	virgin	138	36	91	11	0	2.18116	c587>OctβR3-RNAi virgin vs c587>OctβR3-RNAi Mated	9.11126e-05
		mated	143	66	75	2	0	2.44755
	c587>Oamb-RNAi1	virgin	416	77	301	38	0	2.09375	c587>Oamb-RNAi1 virgin vs c587>Oamb-RNAi1 Mated	0.288116
		mated	429	98	289	42	0	2.13054	c587>+ Mated vs c587>Oamb-RNAi1 Mated	6.98515e-09
	c587>Oamb-RNAi2	virgin	298	74	195	29	0	2.15101	c587>Oamb-RNAi2 virgin vs c587>Oamb-RNAi2 Mated	0.799133
		mated	302	73	206	23	0	2.16556	c587>+ Mated vs c587>Oamb-RNAi2 Mated	3.04193e-07
Figure 1D	c587>+ ; OambΔ/+	virgin	118	21	80	17	0	2.0339	c587>+ ; OambΔ/+ virgin vs c587>+ ; OambΔ/+ Mated	1.55574e-06	Wilcoxon sum rank test
		virgin	117	49	66	2	0	2.40171
	c587>+ ; OambΔ/OambΔ	virgin	118	29	67	22	0	2.05932	c587>+ ; OambΔ/OambΔ virgin vs c587>+ ; OambΔ/OambΔ Mated	0.879796
		virgin	124	27	76	21	0	2.04839
	c587>OambAS ; OambΔ/OambΔ	virgin	131	28	75	28	0	2	c587>OambAS ; OambΔ/OambΔ virgin vs c587>OambAS ; OambΔ/OambΔ Mated	7.04344e-05
		virgin	107	40	63	4	0	2.33645
Panel	genotype	mating	number	number of germaria				average # of GSCs	# of GSCs	# of pH3+ cells	% of pH3+ GSCs	p value		statistical test used
				3 GSCs	2 GSCs	1 GSC	0 GSC
Figure 1E	c587>+	virgin	237	58	150	29	0	2.12236	503	6	0.0119284	c587>+ Virgin vs c587>+ Mated	0.018207	Fisher's exact test
		mated	224	82	136	6	0	2.33929	524	21	0.0400763
	c587>Oamb-IR1	virgin	234	48	162	24	0	2.10256	492	6	0.0121951	c587>Oamb-RNAi1 virgin vs c587>Oamb-RNAi1 Mated	0.7886
		mated	234	45	164	25	0	2.08547	488	7	0.0143443
	c587>Oamb-IR2	virgin	192	46	125	21	0	2.13021	409	5	0.0122249	c587>Oamb-RNAi2 virgin vs c587>Oamb-RNAi2 Mated	0.2785
		mated	200	46	136	18	0	2.14	428	2	0.0046729
				germarium which have anti-Dcp-1+ Cells
Panel	genotype	Mating	number	None	Somatic	germ cell	Both	％of germarium which have Dcp-1+ somatic cells	％of germarium which have Dcp-1+ germ cells	P value		statistical test used
Figure 1F	c587>+	V	106	70	35	1	0	0.330189	0.00943396	c587>+ Virgin vs c587>+ Mated	1	Fisher's exact test with Holm correction
		M	101	69	30	2	0	0.29703	0.019802	c587>+ virgin vs c587>Oamb-RNAi1 virgin	0.21656
	c587>Oamb-IR1	V	90	70	15	4	1	0.166667	0.0444444	c587>Oamb-RNAi1 virgin vs c587>Oamb-RNAi1 Mated	1
		M	113	88	20	5	0	0.176991	0.0442478	c587>+ Mated vs c587>Oamb-RNAi1 Mated	0.3522
Panel	genotype	mating	number	number of germaria							average # of cap cells	p Value		statistical test used
				8 cap cells	7 cap cells	6 cap cells	5 cap cells	4 cap cells	3 cap cells	2 cap cells
Figure 1I	c587>+	virgin	52	2	9	26	12	1	1	1	5.84615	c587>+ Virgin vs c587>Oamb-RNAi1 virgin	0.55	Wilcoxon sum rank test
	c587>Oamb-RNAi1	virgin	51	3	10	25	11	1	1	0	6

## Sheet: Figure 1 figure suppelement1
Panel	genotype	mating	sample number	number of germaria				average # of GSCs	p Value		statistical test used
				3 GSCs	2 GSCs	1 GSC	0 GSC
Fugure 1 figure suppelement1 A	R44E10>+	Virgin	83	20	59	4	0	2.19277	R44E10>+ vigin vs R44E10>+ mated	0.00794434	Wilcoxon sum rank test
		Mated	94	39	54	1	0	2.40426
	R44E10>Oamb-RNAi1	Virgin	118	33	77	8	0	2.21186	R44E10>Oamb-RNAi1 vigin vs R44E10>Oamb-RNAi1 mated	0.000936415
		Mated	111	52	58	1	0	2.45946
	R44E10>Oamb-RNAi2	Virgin	112	27	78	7	0	2.17857	R44E10>Oamb-RNAi2 vigin vs R44E10>Oamb-RNAi2 mated	2.52323e-05
		Mated	113	56	56	1	0	2.48673
Fugure 1 figure suppelement1 B	RS>+	Virgin	108	21	76	11	0	2.09259	RS>+ vigin vs RS>+ mated	2.6004e-06	Wilcoxon sum rank test
		Mated	105	49	55	1	0	2.45714
	RS>Oamb-RNAi1	Virgin	108	30	74	4	0	2.24074	RS>Oamb-RNAi1 vigin vs RS>Oamb-RNAi1 mated	0.000976731
		Mated	109	54	53	2	0	2.47706
	RS>Oamb-RNAi2	Virgin	107	38	64	5	0	2.30841	RS>Oamb-RNAi2 vigin vs RS>Oamb-RNAi2 mated	0.00259932
		Mated	104	58	44	2	0	2.53846
Fugure 1 figure suppelement1 C	tj>+	virgin	106	24	68	14	0	2.09434	tj>+ vigin vs tj>+ mated	7.65546e-06	Wilcoxon sum rank test
		mated	108	50	58	0	0	2.46296
	tj>Oamb-RNAi1	virgin	115	22	75	18	0	2.03478	tj>Oamb-RNAi1 vigin vs tj>Oamb-RNAi1 mated	0.980985
		mated	111	23	69	19	0	2.03604
	tj>Oamb-RNAi2	virgin	147	23	109	15	0	2.05442	tj>Oamb-RNAi2 vigin vs tj>Oamb-RNAi2 mated	0.240481
		mated	163	33	117	13	0	2.1227
	tj>Oamb-RNAi3	virgin	112	38	62	12		2.23214	tj>Oamb-RNAi3 vigin vs tj>Oamb-RNAi3 mated	0.714592
		mated	115	39	68	8		2.26957
Fugure 1 figure suppelement1 D	+>Oamb-RNAi1	virgin	106	16	80	10	0	2.0566	+>Oamb-RNAi1 vigin vs+>Oamb-RNAi1 mated	1.66846e-06	Wilcoxon sum rank test
		mated	114	47	66	1	0	2.40351
	nos>Oamb-RNAi1	virgin	108	20	75	13	0	2.06481	nos>Oamb-RNAi1 vigin nos>Oamb-RNAi1 mated	2.16341e-05
		mated	109	45	62	2	0	2.3945
	nSyb>Oamb-RNAi1	virgin	111	18	83	10	0	2.07207	nSyb>Oamb-RNAi1 vigin nSyb>Oamb-RNAi1 mated	3.90082e-06
		mated	105	44	60	1	0	2.40952
	bab>Oamb-RNAi1	virgin	99	23	69	7	0	2.16162	bab>Oamb-RNAi1 vigin vs bab>Oamb-RNAi1 mated	2.81933e-05
		mated	112	55	56	1	0	2.48214
Fugure 1 figure suppelement1 E	+>Oamb-RNAi1	Virgin	106	23	72	11	0	2.11321	+>Oamb-RNAi1 vigin vs+>Oamb-RNAi1 mated	1.568e-05	Wilcoxon sum rank test
		Mated	122	54	68	0	0	2.44262
	R13C06>Oamb-RNAi1	Virgin	110	34	63	13	0	2.19091	R13C06>Oamb-RNAi1 vigin vs R13C06>Oamb-RNAi1 mated	0.5592
		Mated	121	41	68	12	0	2.23967
	109-30>Oamb-RNAi1	Virgin	114	32	72	10	0	2.19298	109-30>Oamb-RNAi1 vigin vs 109-30>Oamb-RNAi1 mated	0.6376
		Mated	106	34	62	10	0	2.22642
	c355>Oamb-RNAi1	Virgin	96	23	70	3	0	2.20833	c355>Oamb-RNAi1 vigin vs c355>Oamb-RNAi1 mated	0.004063
		Mated	98	42	55	1	0	2.41837
	c306>Oamb-RNAi1	Virgin	116	24	80	12	0	2.10345	c306>Oamb-RNAi1 vigin vs c306>Oamb-RNAi1 mated	7.731e-05
		Mated	106	46	57	3	0	2.40566
	slbo>Oamb-RNAi1	Virgin	111	21	82	8	0	2.11712	slbo>Oamb-RNAi1 vigin vs slbo>Oamb-RNAi1 mated	7.162e-05
		Mated	95	39	56	0	0	2.41053

## Sheet: Figure 2
Panel	genotype	mating	sample number	number of germaria				average # of GSCs	p Value		statistical test used
				3 GSCs	2 GSCs	1 GSC	0 GSC
Figure 2A	c587>+	Virgin	212	36	152	24	0	2.0566	c587>+ Virgin vs c587>+ Virgin+OA	1.28438e-08	Wilcoxon sum rank test with Holm correction
		Virgin+OA	166	69	92	5	0	2.38554	c587>+ Mated vs c587>+ Virgin+OA	0.914963
		Mated	108	44	61	3	0	2.37963
	c587>Oamb-RNAi1	Virgin	111	22	74	15	0	2.06306	c587>Oamb-RNAi1 Virgin vs c587>Oamb-RNAi1 Virgin+OA	0.635492
		Virgin+OA	112	28	67	17	0	2.09821	c587>+ Virgin+OA vs c587>Oamb-RNAi1 Virgin+OA	0.000188021
	c587>Insp3R-RNAi	Virgin	107	30	65	12	0	2.16822	c587>Insp3R-RNAi1 Virgin vs c587>Insp3R-RNAi1 Virgin+OA	0.791869
		Virgin+OA	115	33	71	11	0	2.1913	c587>+ Virgin+OA vs c587>Insp3R-RNAi1 Virgin+OA	0.00753717
Figure 2G	nSyb-GAL80, c587>GFP	Light	100	28	60	12	0	2.16	nSyb-GAL80, c587>GFP Light vs nSyb-GAL80, c587>GFP Light+ATR	0.493958	Wilcoxon sum rank test
		Dark+ATR	111	31	73	7	0	2.21622	nSyb-GAL80, c587>GFP Dark+ATR vs nSyb-GAL80, c587>GFP Light+ATR	0.881
		Light+ATR	116	38	65	13	0	2.21552
	nSyb-GAL80, c587>CsChrimson	Light	177	45	120	12	0	2.18644	nSyb-GAL80, c587>Cschrimson Light vs nSyb-GAL80, c587>Cschrimson Light+ATR	1.48092e-07
		Light+ATR	203	103	96	4	0	2.48768
Figure 2J	c587>+	virgin	188	56	115	17	0	2.20745	c587>+ Virgin vs c587>+ mated	0.000295706
		mated	209	92	114	3	0	2.42584			Wilcoxon sum rank test with holm correction
	c587>Insp3R-IR JF	Virgin	113	32	74	7	0	2.22124	c587>Insp3R-RNAi1 Virgin vs c587>Insp3R-RNAi1 mated	0.411637
		Mated	120	38	78	4	0	2.28333
	c587>Insp3R OE	Virgin	107	51	54	2	0	2.45794	c587>Insp3R OE Virgin vs c587>Insp3R OE mated	0.595805
		Mated	115	50	64	1	0	2.42609	c587>Insp3R OE Virgin vs c587>+ virgin	0.000503437
Panel	genotype	mating	number	number of germaria				average # of GSCs	# of GSCs	# of pH3+ cells	p value	statistical test used
				3 GSCs	2 GSCs	1 GSC	0 GSC
Figure 2H	nSyb-GAL80,c587>Cschrimson	Light	249	82	146	21	0	2.24498	559	6	0.003686	Fisher's Exact test
		Light+ATR	198	87	100	11	0	2.38384	472	19

## Sheet: Figure 2 figure supplement1
Panel	genotype	OA treatment	sample number	number of germaria				average # of GSCs	p Value		statistical test used
				3 GSCs	2 GSCs	1 GSC	0 GSC
Figure 2 figure supplement1A	w1118	-	221	42	146	33	0	2.04072			Wilcoxon sum rank test
		1μM OA	146	48	88	10	0	2.26027	w1118 - vs w1118 1 μM OA	0.000472102
		10μM OA	150	59	76	15	0	2.29333	w1118 - vs w1118 10 μM OA	6.7842e-05
		100μM OA	175	78	95	2	0	2.43429	w1118 - vs w1118 100 μM OA	7.26528e-11
		1mM OA	106	48	56	2	0	2.43396	w1118 - vs w1118 1 mM OA	2.22597e-08

## Sheet: Figure 3
Panel	genotype	mating	sample number	number of germaria				average # of GSCs	p Value		statistical test used
				3 GSCs	2 GSCs	1 GSC	0 GSC
Figure 3A	c587>+	virgin	108	32	62	14	0	2.16667	c587>+ Virgin vs c587>+ Mated	0.00132914	Wilcoxon sum rank test
		mated	113	51	61	1	0	2.44248
	c587>nvd-RNAi1	virgin	114	29	75	10	0	2.16667	c587>nvd-RNAi1 virgin vs c587>nvd-RNAi1 Mated	0.329387
		mated	114	37	67	10	0	2.23684
	c587>nvd-RNAi2	virgin	110	33	69	8	0	2.22727	c587>nvd-RNAi2 virgin vs c587>nvd-RNAi2 Mated	0.685248
		mated	114	30	77	7	0	2.20175
	c587>EcR-RNAi	virgin	105	27	71	7	0	2.19048	c587>EcR-RNAi virgin vs c587>EcR-RNAi Mated	0.662618
		mated	93	30	53	10	0	2.21505
Figure 3B	c587>+	virgin	116	23	83	10	0	2.11207	c587>+ virgin vs c587>+ virgin +OA	6.3462e-05	Wilcoxon sum rank test with Holm correction
		virgin +OA	123	54	64	5	0	2.39837
		virgin +20E	110	35	57	18	0	2.15455	c587>+ virgin vs c587>+ virgin +20E	0.474456
	c587>nvd-RNAi1	virgin	131	38	75	18	0	2.15267	c587>nvd-RNAi1 virgin vs c587>nvd-RNAi1 virgin +OA	0.771816
		virgin +OA	120	31	74	15	0	2.13333
		virgin +OA, +20E	126	55	68	3	0	2.4127	c587>nvd-RNAi1 virgin vs c587>nvd-RNAi1 virgin +OA, +20E	0.00116718
Figure 3C	EcR A483T/ EcRM54fs	21℃ virgin	138	32	92	14	0	2.13043	EcR A483T/ EcRM54fs 21℃ virgin vs EcR A483T/ EcRM54fs 21℃ mated	1.59705e-05	Wilcoxon sum rank test with Holm correction
		21℃ mated	106	52	50	4	0	2.45283	EcR A483T/ EcRM54fs 21℃ mated vs EcR A483T/ EcRM54fs 31℃ virgin	0.000594077
		31℃ virgin	107	34	52	21	0	2.1215	EcR A483T/ EcRM54fs 21℃ mated vs EcR A483T/ EcRM54fs 31℃ mated	0.00044129
		31℃ mated	100	30	52	18	0	2.12
Figure 3C	EcR A483T/ EcRM54fs	21℃ virgin	102	29	63	10	0	2.18627	EcR A483T/ EcRM54fs 21℃ virgin vs EcR A483T/ EcRM54fs 21℃ virgin +OA	0.0012785	Wilcoxon sum rank test with Holm correction
		21℃ virgin +OA	106	51	52	3	0	2.45283	EcR A483T/ EcRM54fs 21℃ virgin +OA vs EcR A483T/ EcRM54fs 31℃ virgin	6.39731e-05
		31℃ virgin	111	28	68	15	0	2.11712	EcR A483T/ EcRM54fs 21℃ virgin +OA vs EcR A483T/ EcRM54fs 31℃ virgin +OA	1.90925e-05
		31℃ virgin +OA	112	27	68	17	0	2.08929

## Sheet: Figure4
Panel	genotype	mating	sample number	number of germaria				average # of GSCs	p Value		statistical test used
				3 GSCs	2 GSCs	1 GSC	0 GSC
Figure 4A	c587>+	virgin	106	31	66	9	0	2.20755	c587>+ Virgin vs c587>+ Mated	0.000436124	Wilcoxon sum rank test
		mated	108	54	53	1	0	2.49074
	c587>Mmp2-RNAi1	virgin	100	27	63	10	0	2.17	c587>Mmp2-RNAi1 virgin vs c587>Mmpw-RNAi1 Mated	0.563979
		mated	109	31	71	7	0	2.22018
	c587>Mmp2-RNAi2	virgin	110	25	74	11	0	2.12727	c587>Mmp2-RNAi2 virgin vs c587>Mmpw-RNAi2 Mated	0.381355
		mated	103	20	69	14	0	2.05825
Figure 4B	c587>+	virgin	105	35	60	10	0	2.2381	c587>+ Virgin vs c587>+ Mated	0.00312577	Wilcoxon sum rank test with Holm correction
		mated	120	59	60	1	0	2.48333
	c587>Timp-RNAi	virgin	109	51	56	2	0	2.44954	c587>Timp-RNAi virgin vs c587>Timp-RNAi Mated	0.504521
		mated	112	57	54	1	0	2.5	c587>+ Virgin vs c587>Timp-RNAi virgin	0.0130525
	c587>Timp OE	virgin	94	24	59	11	0	2.1383	c587>Timp-OE virgin vs c587>Timp-OE Mated	0.539986
		mated	99	28	62	9	0	2.19192
Figure 4C	c587>+	Virgin	103	12	80	11	0	2.00971	c587>+ Virgin vs c587>+ Virgin+OA	7.2e-05	Wilcoxon sum rank test with Holm correction
		Virgin+OA	99	36	60	3	0	2.33333	c587>Mmp2-RNAi1 virgin vs c587>+ Virgin+OA	0.0017
	c587>Mmp2-RNAi1	Virgin	100	20	62	18	0	2.02	c587>Mmp2-RNAi1 virgin vs c587>Mmp2-RNAi Virgin+OA	1
		Virgin+OA	104	21	65	18	0	2.02885
Figure 4E	c587>Insp3R, lacZ-RNAi	virgin	110	53	55	2	0	2.46364	c587>Insp3R OE, LacZ-RNAi Virgin vs c587>Insp3R OE, LacZ-RNAi mated	1	Wilcoxon sum rank test with Holm correction
		mated	106	47	57	2	0	2.42453
	c587>Insp3R, Oamb-RNAi1	virgin	111	49	58	4	0	2.40541	c587>Insp3R OE, Oamb-RNAi1 Virgin vs c587>Insp3R OE, Oamb-RNAi1 mated	1
		mated	105	50	54	1	0	2.46667
	c587>Insp3R, Mmp2-RNAi1	virgin	116	35	65	16	0	2.16379	c587>Insp3R OE, LacZ-RNAi1 Virgin vs c587>Insp3R OE, Mmp2-RNAi1 virgin	0.00879
		mated	115	33	70	12	0	2.18261	c587>Insp3R OE, LacZ-RNAi1 Virgin vs c587>Insp3R OE, Mmp2-RNAi1 Mated	0.00185
	c587>Insp3R, Nvd-RNAi1	virgin	122	24	83	15	0		c587>Insp3R OE, LacZ-RNAi1 Virgin vs c587>Insp3R OE, nvd-RNAi1 virgin	1.2e-05
		mated	107	24	68	15	0		c587>Insp3R OE, LacZ-RNAi1 Virgin vs c587>Insp3R OE, nvd-RNAi1 Mated	0.00012
											AV	AM	BV	BM	CV
											1	0.000472102	6.7842e-05	7.26528e-11	2.22597e-08
											0.000472102	1	0.511935	0.00890026	0.0205373
											6.7842e-05	0.511935	1	0.0757262	0.115122
											7.26527e-11	0.00890026	0.0757262	1	0.962455
											2.22597e-08	0.0205373	0.115122	0.962455	1

## Sheet: Figure4 figure supplement1
Panel	genotype	mating	sample number	number of germaria				average # of GSCs	p Value		statistical test used
				3 GSCs	2 GSCs	1 GSC	0 GSC
Fugure 4 figure suppelement1A	bab>+	virgin	111	30	70	11	0	2.17117	bab>+ virgin vs bab>+ mated	6.65907e-05	Wilcoxon sum rank test
		mated	120	59	60	1	0	2.48333
	bab>Mmp2-RNAi1	virgin	105	30	64	11	0	2.18095	bab>Mmp2-RNAi1 virgin vs bab>Mmp2-RNAi1 mated	0.637773
		mated	105	27	66	12	0	2.14286
	bab>Mmp2-RNAi2	virgin	103	30	57	16	0	2.13592	bab>Mmp2-RNAi2 virgin vs bab>Mmp2-RNAi2 mated	0.867445
		mated	106	24	72	10	0	2.13208
Fugure 4 figure suppelement1B	+>Mmp2-RNAi1	virgin	85	24	59	2	0	2.25882	+>Mmp2-RNAi1 virgin vs +>Mmp2-RNAi1 mated	0.05809	Wilcoxon sum rank test
		mated	86	40	45	1	0	2.45349
	tj>Mmp2-RNAi1	virgin	73	13	51	9	0	2.05479	tj>Mmp2-RNAi1 virgin vs tj>Mmp2-RNAi1 mated	0.5347
		mated	82	16	59	7	0	2.10976
	nSyb>Mmp2-RNAi1	virgin	81	19	56	6	0	2.16049	nSyb>Mmp2-RNAi1 virgin vs nSyb>Mmp2-RNAi1 mated	0.0005129
		mated	82	38	44	0	0	2.46341
	R44E10>Mmp2-RNAi1	virgin	78	27	46	5	0	2.28205	R44E10>Mmp2-RNAi1 virgin vs R44E10>Mmp2-RNAi1 mated	0.007787
		mated	80	42	38	0	0	2.525
Fugure 4 figure suppelement1C	+>Timp-RNAi2	virgin	117	41	67	9	0	2.2735	+>Timp-RNAi2 virgin vs +>Timp-RNAi2 Mated	0.0001369	Wilcoxon sum rank test
		mated	111	61	48	2	0	2.53153
	c587>Timp-RNAi2	virgin	106	56	47	3	0	2.5	c587>Timp-RNAi2 virgin vs c587>Timp-RNAi2 Mated	0.5045
		mated	95	52	41	2	0	2.52632
	bab>Timp-RNAi2	virgin	76	41	35	0	0	2.53947	bab>Timp-RNAi2 virgin vs bab>Timp-RNAi2 Mated	0.5902
		mated	84	49	35	0	0	2.58333
	R44E10>Timp-RNAi2	virgin	89	39	45	5	0	2.38202	R44E10>Timp-RNAi2 virgin vs R44E10>Timp-RNAi2 Mated	0.001892
		mated	98	62	35	1	0	2.62245
Panel	genotype	mating	number	number of germaria				average # of cap cells	p Value		statistical test used
				8 cap cells	7 cap cells	6 cap cells	5 cap cells
Fugure 4 figure suppelement1D	c587>+	virgin	22	0	6	12	4	6.09091	c587>+ Virgin vs c587>Mmp2-RNAi1 virgin	0.68	Wilcoxon sum rank test
	c587>Mmp2-RNAi1	virgin	22	0	6	14	2	6.18182

## Sheet: Figure 5
Panel	genotype	mating	sample number	number of germaria				average # of GSCs	p Value		statistical test used
				3 GSCs	2 GSCs	1 GSC	0 GSC
Figure 5A	Tdc2>+	virgin	118	21	83	14	0	2.05932	Tdc2>+ Virgin vs Tdc2>+ Mated	0.00075	Wilcoxon sum rank test with holm correction
		mated	115	45	67	3	0	2.36522
	Tdc2>Tdc2-RNAi1	virgin	162	24	110	28	0	1.97531	Tdc2>Tdc2-RNAi1 virgin vs Tdc2>Tdc2-RNAi1 Mated	1
		mated	173	31	120	22	0	2.05202	Tdc2>Tdc2-RNAi1 Mated vs Tdc2>Tdc2-RNAi1 Mated +OA	0.00025
		mated +OA fed	112	45	62	5	0	2.35714
	Tdc2>Tβh-RNAi1	virgin	120	20	83	17	0	2.025	Tdc2>Tβh-RNAi1 virgin vs Tdc2>Tβh-RNAi1 mated +OA	1
		mated	115	22	82	11	0	2.09565	Tdc2>Tβh-RNAi1 mated vs Tdc2>Tβh-RNAi1 mated +OA	0.03024
		mated +OA fed	113	41	67	5	0	2.31858
Figure 5C	tub>GAL80>:Tdc2>+, dsx-FLP	virgin	123	29	85	9	0	2.1626	tub>GAL80>:Tdc2>+, dsx-FLP virgin vs tub>GAL80>:Tdc2>+, dsx-FLP mated	0.00038	Wilcoxon sum rank test with holm correction
		mated	130	60	67	3	0	2.43846
	tub>GAL80>:Tdc2>Tdc2-RNAi1, dsx-FLP	virgin	127	26	85	16	0	2.07874	tub>GAL80>:Tdc2>+, dsx-FLP mated vs tub>GAL80>:Tdc2>Tdc2-RNAi1, dsx-FLP virgin	6.3e-06
		mated	123	37	70	16	0	2.17073	tub>GAL80>:Tdc2>+, dsx-FLP mated vs tub>GAL80>:Tdc2>Tdc2-RNAi1, dsx-FLP mated	0.00348
Figure 5D	+>stop>TrpA1 ;dsx-FLP 17℃	virgin	204	51	130	23	0	2.13725	+>stop>TrpA1 ;dsx-FLP 17℃ virgin vs +>stop>TrpA1 ;dsx-FLP 17℃ mated	0.00086	Wilcoxon sum rank test with holm correction
		mated	195	86	97	12	0	2.37949
	Tdc2>stop>TrpA1 dsx-FLP 17℃	virgin	190	37	135	18	0	2.1	Tdc2>stop>TrpA1 ;dsx-FLP 17℃ virgin vs Tdc2>stop>TrpA1 ;dsx-FLP 17℃ mated	2.3e-05
		mated	231	90	129	12	0	2.33766
	+>stop>TrpA1 dsx-FLP 29℃	virgin	191	49	123	19	0	2.15707	+>stop>TrpA1 ;dsx-FLP 29℃ virgin vs +>stop>TrpA1 ;dsx-FLP 29℃ mated	0.04866
		mated	186	69	110	7	0	2.33333
	Tdc2>stop>TrpA1 dsx-FLP 29℃	virgin	170	80	87	3	0	2.45294	Tdc2>stop>TrpA1 ;dsx-FLP 29℃ virgin vs Tdc2>stop>TrpA1 ;dsx-FLP 29℃ mated	1
		mated	204	90	113	1	0	2.43627	Tdc2>stop>TrpA1 ;dsx-FLP 17℃ virgin vs Tdc2>stop>TrpA1 ;dsx-FLP 29℃ virgin	6.2e-08
Figure 5F	Tdc2>+;OambΔ/+17℃	virgin	128	38	73	17	0	2.16406	Tdc2>+;OambΔ/+ 17℃ virgin vs Tdc2>+;OambΔ/+ 29℃ virgin	1	Wilcoxon sum rank test with holm correction
	Tdc2>+;OambΔ/+29℃	virgin	138	37	89	12	0	2.18116
	Tdc2>TrpA1;OambΔ/+17℃	virgin	121	27	79	15	0	2.09917	Tdc2>TrpA1;OambΔ/+ 17℃ virgin vs Tdc2>TrpA1;OambΔ/+ 29℃ virgin	2e-05
	Tdc2>TrpA1;OambΔ/+29℃	virgin	162	73	88	1	0	2.44444	Tdc2>TrpA1;OambΔ/+ 29℃ virgin vs Tdc2>TrpA1;OambΔ/OambΔ 17℃ virgin	3.2e-05
	Tdc2>TrpA1;OambΔ/OambΔ 17℃	virgin	130	30	85	15	0	2.11538	Tdc2>TrpA1;OambΔ/OambΔ 17℃ virgin vs Tdc2>TrpA1;OambΔ/OambΔ 29℃ virgin	1
	'Tdc2>TrpA1;OambΔ/OambΔ 29℃	virgin	144	34	99	11	0	2.15972	Tdc2>TrpA1;OambΔ/+ 29℃ virgin vs Tdc2>TrpA1;OambΔ/OambΔ 29℃ virgin	8.4e-05
Figure 5G	Tdc2>stop>TNTin, dsx-FLP	virgin	104	21	76	7	0	2.13462	Tdc2>stop>TNTin ;dsx-FLP virgin vs Tdc2>stop>TNTin ;dsx-FLP mated	8.3e-06	Wilcoxon sum rank test with holm correction
		mated	140	66	74	0	0	2.47143
	Tdc2>stop>TNT, dsx-FLP	virgin	103	18	78	7	0	2.1068	Tdc2>stop>TNTin ;dsx-FLP mated vs Tdc2>stop>TNT ;dsx-FLP virgin	9.6e-07
		mated	108	27	70	11	0	2.14815	Tdc2>stop>TNTin ;dsx-FLP mated vs Tdc2>stop>TNT ;dsx-FLP mated	0.00016
	genotype	mating	number	number of germaria				average # of GSCs	# of total GSCs	# of pH3+ cells	% of pH3+ GSCs	p value
				3 GSCs	2 GSCs	1 GSC	0 GSC
Figure 5E	+>stop>TrpA1 dsx-FLP 17℃	virgin	204	51	130	23	0	2.13725	436	6	0.0137615	+>stop>TrpA1 ;dsx-FLP 17℃ virgin vs +>stop>TrpA1 ;dsx-FLP 17℃ mated	0.01529
		mated	195	86	97	12	0	2.37949	464	20	0.0431034
	+>stop>TrpA1 dsx-FLP 29℃	virgin	195	53	123	19	0	2.17436	424	7	0.0165094	+>stop>TrpA1 ;dsx-FLP 29℃ virgin vs +>stop>TrpA1 ;dsx-FLP 29℃ mated	0.01843
		mated	186	69	110	7	0	2.33333	434	20	0.0460829
	Tdc2>stop>TrpA1 dsx-FLP 17℃	virgin	190	37	135	18	0	2.1	399	7	0.0175439	Tdc2>stop>TrpA1 ;dsx-FLP 17℃ virgin vs Tdc2>stop>TrpA1 ;dsx-FLP 17℃ mated	0.03374
		mated	209	68	129	12	0	2.26794	474	21	0.0443038
	Tdc2>stop>TrpA1 dsx-FLP 29℃	virgin	163	73	87	3	0	2.42945	396	23	0.0580808	Tdc2>stop>TrpA1 ;dsx-FLP 29℃ virgin vs Tdc2>stop>TrpA1 ;dsx-FLP 29℃ mated	0.4292
		mated	184	70	113	1	0	2.375	437	19	0.0434783

## Sheet: Figure5 figure supplement1
Panel	genotype	mating	sample number	number of germaria				average # of GSCs	p Value		statistical test used
				3 GSCs	2 GSCs	1 GSC	0 GSC
Figure5 figure supplement1A	nSyb>+	virgin	110	30	65	15		2.13636	nSyb>+ Virgin vs nSyb>+ Mated	0.00116066	Wilcoxon sum rank test
		mated	106	46	58	2		2.41509
	nSyb>TβH-RNAi1	virgin	105	28	67	10		2.17143	nSyb>TβH-RNAi1 Virgin vs nSyb>TβH-RNAi1 Mated	0.647882
		mated	101	23	69	9		2.13861
	nSyb>Tdc2-RNAi1	virgin	106	20	64	22		1.98113	nSyb>Tdc2-RNAi1 Virgin vs nSyb>Tdc2-RNAi1 Mated	0.81345
		mated	104	16	72	16		2
Figure5 figure supplement1B	Tdc2>+	virgin	118	21	83	14	0	2.05932	Tdc2>+ Virgin vs Tdc2>+ Mated	3.56424e-05	Wilcoxon sum rank test
		mated	115	45	67	3	0	2.36522
	Tdc2>TβH-RNAi2	virgin	120	20	83	17	0	2.025	Tdc2>TβH-RNAi2 Virgin vs Tdc2>TβH-RNAi2 Mated	0.327079
		mated	115	22	82	11	0	2.09565
	Tdc2>Tdc2-RNAi2	virgin	119	19	82	18	0	2.0084	Tdc2>Tdc2-RNAi2 virgin vs Tdc2>Tdc2-RNAi2 Mated	0.714457
		mated	114	19	80	15	0	2.03509

## Sheet: Figure6
Panel	genotype	mating	sample number	number of germaria				average # of GSCs	p Value		statistical test used
				3 GSCs	2 GSCs	1 GSC	0 GSC
Figure 5C	ppk>+	virgin	118	21	90	7	0	2.11864	ppk>+ virgin vs ppk>+ mated	9.4e-06	Wilcoxon sum rank test with Holm correction
		mated	111	51	60	0	0	2.45946
	ppk>ChAT-RNAi1	virgin	100	46	52	2	0	2.44	ppk>+ mated vs ppk>ChAT-RNAi1 virgin	1
		mated	100	56	44	0	0	2.56	ppk>+ mated vs ppk>ChAT-RNAi1 mated	1
	ppk>ChAT-RNAi2	virgin	102	52	50	0	0	2.5098	ppk>+ mated vs ppk>ChAT-RNAi2 virgin	1
		mated	100	50	48	2	0	2.48	ppk>+ mated vs ppk>ChAT-RNAi2 mated	1
Figure 5D	tub>GAL80>:Tdc2>+, dsx-FLP	virgin	111	21	82	8	0	2.11712	tub>GAL80>:Tdc2>+, dsx-FLP virgin vs tub>GAL80>:Tdc2>+, dsx-FLP mated	7.16238e-05	Wilcoxon sum rank test
		mated	95	39	56	0	0	2.41053
	tub>GAL80>:Tdc2>nAChRα1-IR, dsx-FLP	virgin	117	50	65	2	0	2.41026	tub>GAL80>:Tdc2>nAChRα1-IR, dsx-FLP virgin vs tub>GAL80>:Tdc2>nAChRα1-IR, dsx-FLP mated	0.809516
		mated	135	56	76	3	0	2.39259
	tub>GAL80>:Tdc2>nAChRα2-IR, dsx-FLP	virgin	100	45	55	0	0	2.45	tub>GAL80>:Tdc2>nAChRα2-IR, dsx-FLP virgin vs tub>GAL80>:Tdc2>nAChRα2-IR, dsx-FLP mated	0.82827
		mated	101	45	54	2	0	2.42574
	tub>GAL80>:Tdc2>nAChRα3-IR, dsx-FLP	virgin	114	56	58	0	0	2.49123	tub>GAL80>:Tdc2>nAChRα3-IR, dsx-FLP virgin vs tub>GAL80>:Tdc2>nAChRα3-IR, dsx-FLP mated	0.428672
		mated	104	46	57	1	0	2.43269
	tub>GAL80>:Tdc2>nAChRβ1-IR（TRiP）, dsx-FLP	virgin	108	46	57	5	0	2.37963	tub>GAL80>:Tdc2>nAChRβ1-IR, dsx-FLP virgin vs tub>GAL80>:Tdc2>nAChRβ1-IR, dsx-FLP mated	0.901504
		mated	116	49	64	3	0	2.39655
	tub>GAL80>:Tdc2>nAChRβ2-IR, dsx-FLP	virgin	104	41	60	3	0	2.36538	tub>GAL80>:Tdc2>nAChRβ2-IR, dsx-FLP virgin vs tub>GAL80>:Tdc2>nAChRβ2-IR, dsx-FLP mated	0.393309
		mated	100	47	48	5	0	2.42
Figure 6E	Tdc2>+; SPSN-LexA>shibire ts	21°C, virgin	108	32	69	7	0	2.23148	Tdc2>+; SPSN-LexA>shibire ts 21℃ virgin vs Tdc2>+; SPSN-LexA>shibire ts 21℃ mated	0.0218	Wilcoxon sum rank test with Holm correction
		21°C, mated	109	52	54	3	0	2.44954
		31°C, virgin	120	60	59	1	0	2.49167	Tdc2>+; SPSN-LexA>shibire ts 21℃ virgin vs Tdc2>+; SPSN-LexA>shibire ts 31℃ virgin	0.0045
	Tdc2>Tdc2-RNAi1 ; SPSN-LexA>shibire ts	21°C, virgin	102	28	65	9	0	2.18627	Tdc2>+; SPSN-LexA>shibire ts 31℃ virgin vs Tdc2>Tdc2-RNAi1; SPSN-LexA>shibire ts 21℃ virgin	0.0011
		31°C, virgin	115	36	67	12	0	2.2087	Tdc2>+; SPSN-LexA>shibire ts 31℃ virgin vs Tdc2>Tdc2-RNAi1; SPSN-LexA>shibire ts 31℃ virgin	0.0041
Panel	genotype	mating	sample number	number of germaria				average # of GSCs	p Value		statistical test used
				4 GSCs	3 GSCs	2 GSCs	1 GSC
Figure 6F	c587>+, SPSN-LexA>kir2.1	V	132	30	56	46	0	2.87879	c587>+, SPSN-LexA>kir2.1 virgin vs c587>+, SPSN-LexA>kir2.1 mated	1	Wilcoxon sum rank test with Holm correction
		M	110	28	44	37	1	2.9
	c587>Oamb-RNAi1, SPSN-LexA>-kir2.1	V	103	6	44	49	4	2.50485	c587>+, SPSN-LexA>kir2.1 virgin vs c587>Oamb-RNAi1, SPSN-LexA>kir2.1 virgin	0.002
	c587>Insp3R-RNAi, SPSN-LexA>-kir2.1	V	119	6	56	55	2	2.55462	c587>+, SPSN-LexA>kir2.1 virgin vs c587>Insp3R-RNAi, SPSN-LexA>kir2.1 virgin	0.0035

[truncated: 1 more sheets: Figure6 figure supplement ]
