# Supplementary material for: Neuronal octopamine signaling regulates mating-induced germline stem cell increase in female Drosophila melanogaster
Source: eLife. 2020 Oct 20;9:e57101. doi: 10.7554/eLife.57101 (PMC7591258; doi:10.7554/eLife.57101)
Supplement: Source data 2. — Raw data of pMad and Dad-LacZ signal intensity for Figure 1, Figure 1—figure supplement 3, Figure 2, and Figure 4. [file elife-57101-data2.xlsx]

## Sheet: Figure 1G
	Relative pMad signal intensity (pMad/Vasa)
	c587>+ virgin	c587>+ mated	c587>Oamb-RNAi1 virgin	c587>Oamb-RNAi1 mated									> wilcox.exact(dat$cont,dat$contOA,paired=F) Exact Wilcoxon rank sum test data: dat$cont and dat$contOA W = 55, p-value = 0.0001051 alternative hypothesis: true mu is not equal to 0 > dat<-read.csv("csv.csv") > boxplot(dat) > wilcox.exact(dat$cont,dat$c587Mmp2IR,paired=F) Exact Wilcoxon rank sum test data: dat$cont and dat$c587Mmp2IR W = 213.5, p-value = 0.6261 alternative hypothesis: true mu is …
1	1.44941	0.78372	0.590607	0.507605
2	1.45953	1.47939	0.787432	0.618605
3	0.676537	1.50629	0.766571	0.681164
4	1.09994	1.0917	0.869885	0.738468
5	1.66119	1.2941	1.00949	0.897256
6	1.42585	0.985983	1.11288	0.770309
7	0.862069	1.29438	0.936051	0.875715
8	0.926823	1.21862	0.883715	0.763225
9	1.28934	1.519	0.477123	0.734181
10	0.762336	1.26205	0.817862	1.55832
11	1.13421	1.3119	0.756219	1.13957
12	0.956024	1.14166	1.23075	1.10613
13	0.482796	2.00781	1.19661	0.663283
14	0.792818	1.23515	1.01393	0.495397
15	0.399951	1.19141	0.775512	0.816947
16	1.28565	1.41851	0.718887	0.686471
17	0.955292	1.23245	1.07633	0.558583
18	0.749343	1.27669	1.37569	0.788347
19	1.10012	0.905753	1.17076	0.651048
20	1.63371	1.12333	1.21706	0.54993
21	0.555602	1.81483	0.723671	1.28534
22	1.58749	1.30144	0.838018	1.24568
23	1.01291	1.13641	1.22202	1.18069
24	1.2323	1.19985	1.30105	1.27384
25	1.06943	1.2123	0.883505	0.720796
26	1.15149	1.61241	0.738677	0.795772
27	0.848187	1.42321	1.3416	0.74584
28	1.1203	1.43485	1.1379	0.842593
29	0.805993	1.36837	0.755983	1.02446
30	0.614475	1.61123	1.14477	1.15805
31	1.05066	1.86541	0.980049	1.08122
32	1.0086	1.51835	0.646369	0.706339
33	0.655179	1.20163	0.927817	0.920288
34	0.805915		0.930666	0.538793
35	0.758911		0.948966	1.04449
36	0.722051		0.611259	0.672903
37	1.14001		0.8645	0.639859
38	0.613638		0.8565	0.660982
39	0.67123		0.809078	0.586267
40	0.933307			0.709215
41	1.3383			0.914928
42	1.26032			1.08843
43	1.41166			0.948913
44	1.18754
45	1.11724
46	0.636827
47	0.587496
	p Value		N value	statistical test used
	c587>+ Virgin vs c587>+ Mated	1.9e-05	n≧30	Wilcoxon sum rank test with Holm correction
	c587>Oamb-RNAi1 Virgin vs c587>Oamb-RNAi1 mated	0.081

## Sheet: Figure 1figure supplement3
	Relative Dad-LacZ signal intensity (pMad/Vasa)
	c587>+ ; Dad-LacZ virgin	c587>+ ; Dad-LacZ mated	c587>Oamb-RNAi1 ; Dad-LacZ virgin	c587>Oamb-RNAi1 ; Dad-LacZ mated									> wilcox.exact(dat$cont,dat$contOA,paired=F) Exact Wilcoxon rank sum test data: dat$cont and dat$contOA W = 55, p-value = 0.0001051 alternative hypothesis: true mu is not equal to 0 > dat<-read.csv("csv.csv") > boxplot(dat) > wilcox.exact(dat$cont,dat$c587Mmp2IR,paired=F) Exact Wilcoxon rank sum test data: dat$cont and dat$c587Mmp2IR W = 213.5, p-value = 0.6261 alternative hypothesis: true mu is …
1	1.37379	1.0622	0.642107	0.882419
2	1.1525	0.96227	1.05541	0.881627
3	0.785259	0.987458	1.19958	0.998272
4	1.00391	0.663273	1.07315	0.811074
5	1.08712	0.78028	1.09903	1.14245
6	0.808073	0.855978	1.09283	1.02824
7	1.03012	1.2583	0.834646	1.10635
8	1.13358	1.09814	0.814239	1.04156
9	1.26961	1.05231	0.934807	1.01268
10	0.882023	0.891419	0.915058	1.18076
11	1.19813	1.41227	0.972194	1.22856
12	0.878298	1.36383	1.02478	1.22873
13	1.51714	1.41006	0.895573	0.948126
14	1.08459	1.30218	0.99158	1.03035
15	1.31062	1.52845	1.24383	1.18409
16	1.02778	1.55766	0.938928	1.24623
17	0.9988	1.63543	0.742267	1.15277
18	0.812755	1.42018	1.13031	1.21547
19	1.05234	1.14334	0.779423	1.31517
20	0.932927	1.00164	1.64724	1.48602
21	0.911333	1.29977	1.14799	1.37125
22	0.912322	1.28774	1.07463	1.54635
23	0.77972	1.04337	1.04904	0.981623
24	0.815294	0.819777	1.23789	0.980931
25	1.00398	1.14841	0.97193	0.768642
26	1.11393	1.42849	0.932796	0.933455
27	0.759609	1.43363	1.13872	0.672405
28	1.11591	1.22883	1.26621	0.776819
29	0.962863	1.13107	0.909948	0.841801
30	1.1643	1.14973	1.0979	0.666207
31	0.826371	0.986799	1.0259	1.16988
32	0.980931	1.14749	0.98792	0.682956
33	0.833723	0.979249	1.1764	0.892573
34	0.82469		1.01004	0.777181
35	0.83491		0.774379	1.12557
36	0.874209		1.32272	0.926993
37	0.991481		1.03441	1.0017
38	0.946115		1.71139	0.884001
39	0.955841			0.971699
40	0.891617			1.22714
41	1.39624			1.26344
42	1.3187			1.2281
43	1.31725			0.881627
44	0.836855
	p Value		N value	statistical test used
	c587>+ Virgin vs c587>+ Mated	0.0084	n≧30	Wilcoxon sum rank test with Holm correction
	c587>Oamb-RNAi1 Virgin vs c587>Oamb-RNAi1 mated	0.9133

## Sheet: Figure 2B
	Relative pMad signal intensity (pMad/Vasa)
	c587>+ virgin	c587>+ mated	c587>+ virgin +OA	c587>Oamb-RNAi1 virgin	c587>Oamb-RNAi1 virgin +OA								> wilcox.exact(dat$cont,dat$contOA,paired=F) Exact Wilcoxon rank sum test data: dat$cont and dat$contOA W = 55, p-value = 0.0001051 alternative hypothesis: true mu is not equal to 0 > dat<-read.csv("csv.csv") > boxplot(dat) > wilcox.exact(dat$cont,dat$c587Mmp2IR,paired=F) Exact Wilcoxon rank sum test data: dat$cont and dat$c587Mmp2IR W = 213.5, p-value = 0.6261 alternative hypothesis: true mu is …
1	0.972727	1.53704	1.7377	0.394737	1.17073
2	1.26087	1.41304	0.645833	1.34091	0.516667
3	0.570552	0.912281	0.537037	0.493333	0.549451
4	0.628099	0.53012	0.758065	0.408696	0.619048
5	1.63736	0.863636	0.27619	0.591549	0.355372
6	0.448598	2	0.88	0.5	0.515789
7	0.477612	0.833333	0.716216	0.395062	0.433962
8	0.901408	0.650602	0.651515	1.13514	0.178571
9	0.298851	0.26087	0.818182	0.423729	0.505882
10	0.655738	0.583333	1.33929	0.764706	0.828571
11	0.272727	1.375	1.07018	0.615385	1.2449
12	0.568966	1.31373	0.807692	1.36111	1.20312
13	0.289474	0.96	0.85	1	1.26786
14	0.485714	0.603448	0.891304	0.816327	1.13158
15	0.197674	0.618182	0.905405	0.820513	1.16129
16	0.578431	0.830769	1.19177	0.728814	0.571429
17	0.246269	0.66129	0.485714	0.576923	0.977778
18	0.428571	0.9	0.68	1.10606	0.605634
19	0.548872	0.861111	0.580645	0.83871	0.422222
20	0.38835	2	1.89655	1.54054	0.641791
21	0.592843	1.73684	1.18033	0.197674	0.214286
22	0.6403	1.41935	0.712121	0.428571	0.431818
23	0.358974	1.87879	0.430769	0.55	0.690909
24	0.532242	1.54545	1.18	0.207547	0.471429
25	0.541523	1.1875	0.788462	0.285714	0.698113
26	0.321429	0.740741	0.981132	0.492958	0.660377
27	0.466298	1.90625	1.16	0.269231	0.64557
28	0.473238		0.978261		0.859155
29	0.493151		0.925
30	0.454039		0.710526
31			0.712644
32			0.661765
33			1.30769
34			0.961538
35			1.6
36			1.18966
	p Value		N value	statistical test used
	c587>+ Virgin vs c587>+ Mated	5.61e-07	n≧25	Wilcoxon sum rank test with Holm correction
	c587>+ Virgin vs c587>+ Virgin+OA	6.795e-07
	c587>+ Virgin+OA vs c587>Oamb-RNAi1 Virgin	0.005028
	c587>+ Virgin+OA vs c587>Oamb-RNAi1 Virgin+OA	0.005563

## Sheet: Figure 2I
		nSyb-GAL80, c587>Cschrimson	nSyb-GAL80, c587>Cschrimson		p Value		N value	statistical test used
	sample number	Light	Light+ATR		nSyb-GAL80, c587>Cschrimson Light vs nSyb-GAL80, c587>Cschrimson Light+ATR	0.008346	n>40	Wilcoxon sum rank test
Relative pMad signal intensity (pMad/Vasa)	1	0.607595	0.759259
	2	0.716667	0.934211
	3	0.741935	0.8125
	4	0.451613	1
	5	0.85	1.5102
	6	0.875	0.644231
	7	0.945946	0.776471
	8	0.963636	1.2381
	9	0.717172	1.4
	10	0.597403	0.719008
	11	0.519337	0.477941
	12	0.497354	0.612903
	13	0.795775	0.744898
	14	0.30719	0.548148
	15	0.488889	1.18919
	16	0.671329	0.641221
	17	0.77907	0.680851
	18	0.436047	0.773196
	19	0.95122	0.989796
	20	0.45	0.98913
	21	0.40708	1.05
	22	1.04167	1.30682
	23	1.01493	0.862385
	24	0.575	1.10127
	25	0.857143	0.559211
	26	0.592593	0.72
	27	0.921348	0.609091
	28	0.744186	0.807692
	29	1.10769	0.671329
	30	1.38806	0.658333
	31	0.597403	1.24107
	32	0.541667	0.385714
	33	0.6	0.790323
	34	0.448718	0.706522
	35	0.482014	0.613333
	36	0.5	0.552239
	37	0.6	0.525974
	38	0.485714	0.842105
	39	0.382353	0.859155
	40	0.535354	0.710145
	41	0.373913	0.617021
	42	0.712644	1.07527
	43	0.673158
	44	0.962025
	45	0.825243
	46	0.816901
	47	0.65
	48	0.356522
	49	1.04762
	50	0.676556

## Sheet: Figure 4D
	Relative pMad signal intensity (pMad/Vasa)
	c587>+ virgin	c587>+ virgin +OA	c587>Mmp2-RNAi1 virgin	c587>Mmp2-RNAi1 virgin +OA								> wilcox.exact(dat$cont,dat$contOA,paired=F) Exact Wilcoxon rank sum test data: dat$cont and dat$contOA W = 55, p-value = 0.0001051 alternative hypothesis: true mu is not equal to 0 > dat<-read.csv("csv.csv") > boxplot(dat) > wilcox.exact(dat$cont,dat$c587Mmp2IR,paired=F) Exact Wilcoxon rank sum test data: dat$cont and dat$c587Mmp2IR W = 213.5, p-value = 0.6261 alternative hypothesis: true mu is …
1	1.58755	2.39761	0.95208	0.993894
2	0.906722	1.40437	1.83098	0.666002
3	1.1322	1.09328	0.827191	1.40514
4	1.36082	1.06144	0.464072	0.955296
5	0.740927	1.82214	0.936565	0.440015
6	1.16533	1.76534	1.81961	0.749252
7	0.942559	1.55063	0.594407	0.424576
8	1.11682	1.57343	1.29142	0.613277
9	0.767727	2.18353	1.29219	0.480652
10	0.987139	0.660452	0.718513	0.682652
11	1.19989	1.18881	1.23627	0.731214
12	0.972987	1.16758	1.002	0.6634
13	0.372435	1.30203	0.630016	0.77839
14	0.727845	1.88027	0.435749	0.94822
15	0.406116	2.50702	0.541335	0.509491
16	0.89161	3.07193	2.09458	0.571878
17	0.849152		0.368711
18	1.76534
19	0.89161
20	1.002
21	1.11944
22	1.06144
23	1.03234
	p Value		N value	statistical test used
	c587>+ virgin vs c587>+ virgin+OA	0.0012	n≧15	Wilcoxon sum rank test with Holm correction
	c587>+ virgin vs c587>Mmp2-RNAi1 virgin	0.6321
	c587>+ virgin+OA vs c587>Mmp2-RNAi1 virgin	0.0086
	c587>+ virgin+OA vs c587>Mmp2-RNAi1 virgin +OA	1.8e-05
