# Supplementary material for: Neuronal octopamine signaling regulates mating-induced germline stem cell increase in female Drosophila melanogaster
Source: eLife. 2020 Oct 20;9:e57101. doi: 10.7554/eLife.57101 (PMC7591258; doi:10.7554/eLife.57101)
Supplement: Source data 3. — Raw data of the TRIC signal intensity for Figure 5. [file elife-57101-data3.xlsx]

## Sheet: Figure 2D
c587>Gcamp6s, turbo::RFP with OA	Cycle	sample1	sample2	sample3	sample4	sample5	sample6	sample7	sample8	sample9	sample10	c587>Gcamp6s, turbo::RFP without OA	Cycle	sample1	sample2	sample3	sample4	sample5	sample6
Relative Gcamp6s fluorecence (normalized by mean of the values from t=-36 to t=0) (Octopamine was administraed at t=0)	-36	1.07339	1.04084	0.969168	0.951396	0.948996	0.946895	1.08319	0.95129	0.999801	1.04201	Relative Gcamp6s fluorecence (normalized by mean of the values from t=-36 to t=0) (Octopamine was administraed at t=0)	-36	1.00948	0.925784	0.932262	1.03176	0.996475	1.10609
	-32	0.985228	1.06157	0.978728	0.979835	0.988093	0.942212	0.854773	0.894793	0.97692	1.02899		-32	1.01217	0.995409	0.99504	1.05533	1.04454	1.14826
	-28	1.00071	1.00675	0.976338	0.890641	0.97743	0.984359	0.880019	1.00168	0.88838	1.00828		-28	0.983254	1.00459	1.03459	1.03893	1.04534	1.13244
	-24	0.997141	1.02614	0.988289	0.965615	1.00764	1.01808	0.892041	0.948236	0.86152	0.977515		-24	1.02495	1.01148	1.03899	1.02152	1.05815	1.03833
	-20	1.04599	1.03617	1.02653	0.955274	0.98987	0.971247	1.03871	1.22309	0.990848	0.97574		-20	1.00276	1.01989	1.04338	1.01742	1.03252	1.03757
	-16	0.966166	0.967311	0.966778	1.06256	0.924116	0.996535	0.991825	0.920751	1.08436	1.00651		-16	1.00814	1.01148	1.05656	0.994877	1.04454	0.999925
	-12	0.994758	0.939234	1.06597	1.02637	1.01653	1.02463	0.901659	0.905482	1.12018	0.998817		-12	0.983254	0.989288	0.946701	0.939549	1.02051	0.912582
	-8	0.954253	0.990039	1.06358	0.986298	1.04141	1.06959	0.964174	0.893266	1.05551	0.993491		-8	0.987289	1.01683	0.947957	0.995902	0.979654	0.873428
	-4	1.00548	1.00742	0.958413	1.07549	1.06629	1.02838	1.11806	1.16964	1.05352	0.97574		-4	1.00881	0.986993	0.996296	0.966189	0.885133	0.882464
	0	0.976888	0.924527	1.00621	1.10651	1.03963	1.01808	1.27555	1.09177	0.968961	0.992899		0	0.979891	1.03826	1.00822	0.938525	0.893143	0.86891
	4	1.04122	0.855004	0.82696	1.10264	1.10894	1.12859	2.05097	1.0597	1.02865	0.981065		4	1.031	0.995409	0.909034	0.969262	0.927587	0.870416
	8	1.07339	0.832943	0.83891	0.972079	1.02897	1.09862	1.36932	1.14521	1.16295	0.989349		8	1.01621	0.971691	0.883295	1	0.931592	0.793615
	12	1.08887	0.82559	1.12333	1.04188	1.16936	1.16418	1.00144	1.12231	1.06546	1.02722		12	1.05723	1.01071	1.07477	0.921107	0.935598	0.875687
	16	1.07696	0.851661	0.85086	1.05739	1.13915	1.18104	0.971387	1.24905	0.983884	1.02485		16	1.04916	0.99694	1.01513	0.954918	0.966037	0.877193
	20	1.09245	0.790828	1.00143	1.04705	1.19602	1.16887	0.991825	1.03069	1.1739	0.997633		20	1.01285	0.977047	0.92724	0.953893	0.857097	0.827498
	24	1.05671	0.895782	0.927342	1.04059	1.17647	1.08926	0.956961	1.06887	1.15698	0.968047		24	1.00948	0.980107	0.976835	0.957992	0.830663	0.792109
	28	1.06862	0.967979	0.872371	0.86091	1.21734	1.03493	1.10363	1.0994	1.11719	0.976331		28	1.00276	0.992349	0.908406	0.946721	0.80503	0.744673
	32	1.09364	0.986028	0.999044	0.98759	1.16403	1.00496	1.34407	1.62162	1.17589	1.00118		32	1.00007	0.986993	0.812983	0.945697	0.872317	0.826745
	36	1.06266	0.883749	1.30617	1.02378	1.18536	1.07614	1.54003	1.62315	1.14505	1.00296		36	0.979219	0.963275	0.752087	0.908811	0.833867	0.855357
	40	1.12938	0.900461	1.1783	1.07291	1.26888	1.14171	1.56768	1.56512	1.17589	1.0142		40	0.994014	0.96251	0.748321	0.903689	0.897949	0.799639
	44	1.09126	0.952604	1.13647	1.13625	1.15159	1.09488	1.13008	1.49641	1.18782	0.945562		44	0.976528	0.986228	0.774688	0.86373	0.888337	0.825992
	48	1.10555	0.780801	1.16276	1.06256	1.22623	1.10424	0.924501	1.16506	1.14704	0.990533		48	1.0115	0.987758	0.772804	0.936475	0.756168	0.760485
	52	1.04241	0.901798	1.09584	1.07032	1.18002	1.12859	0.899255	1.40632	1.19081	1.0142		52	1.05858	1.01454	0.828677	0.911885	0.83627	0.741661
	56	1.10674	0.918511	1.16396	1.06127	1.13204	1.15107	0.966579	1.4506	1.20474	1.00059		56	1.01688	1.01377	0.784732	0.855533	0.857898	0.752955
	60	1.09721	0.860352	1.17949	1.06903	1.22445	1.16325	0.948545	0.96656	1.00279	0.998817		60	1.02024	1.00153	0.787243	0.847336	0.901955	0.73112
	64	1.11032	0.875058	1.12572	1.06386	1.17292	1.11361	0.973792	0.923805	1.05949	0.985207		64	1.04109	0.980872	0.919078	0.900615	0.928388	0.740155
	68	1.10555	0.889097	1.10301	1.03413	1.29376	1.08645	0.989421	0.968087	1.01671	0.994675		68	1.03168	0.976282	0.877645	0.915984	0.94521	0.725849
	72	1.09959	0.868374	1.15201	1.04059	1.23689	1.21476	0.893244	1.0765	1.15897	0.99645		72	0.999395	0.972456	0.858183	0.834016	0.841878	0.725849
	76	1.14963	0.887091	1.27151	1.05998	1.25467	1.13983	1.01467	1.0765	1.21269	1.0142		76	1.02966	0.957154	0.815494	0.834016	0.833867	0.713802
	80	1.15559	0.887091	1.16396	1.06774	1.26177	1.14452	0.988218	1.02	1.16196	1.05207		80	1.05185	0.974751	0.831188	0.867828	0.837071	0.798133
	84	1.12461	0.895113	1.16515	1.07937	1.21557	1.07146	0.982207	0.968087	1.28134	1.07692		84	1.04176	0.959449	0.801682	0.847336	0.822653	0.77705
	88	1.08887	0.855004	1.12213	1.08971	1.25822	1.1698	0.970185	0.968087	1.45046	1.05325		88	1.00074	0.978577	0.783477	0.843238	0.8595	0.852345
	92	1.12342	0.902467	1.18427	1.05481	1.24933	1.15576	0.995432	0.946709	1.45444	0.981065		92	1.00679	0.984698	0.806705	0.836066	0.821852	0.813945
	96	1.09602	0.930543	1.21176	1.05481	1.20313	1.19697	1.02068	0.960452	1.37982	0.991124		96	1.03369	0.993114	0.76276	0.852459	0.857097	0.846322
	100	1.12819	0.898456	1.21176	1.07291	1.28843	1.20914	0.991825	0.943656	1.30123	1.07751		100	1.02495	1	0.770293	0.783811	0.881128	0.877193
	104	1.08649	0.885086	1.26793	1.10134	1.18358	1.22506	0.979803	1.23836	1.28631	1.08047		104	1.03571	0.963275	0.72572	0.822746	0.840276	0.86364
	108	1.14248	0.906478	1.23685	1.04059	1.18358	1.22694	1.0351	1.13147	1.22065	1.08698		108	1.04513	0.935731	0.846255	0.821721	0.823454	0.831263
	112	1.11151	0.845645	1.201	1.04705	1.244	1.19135	1.10243	1.20934	1.13211	1.09172		112	1.01621	0.952563	0.850022	0.822746	0.830663	0.912582
	116	1.17703	0.84765	1.21534	1.06515	1.25111	1.13047	1.0892	1.28417	1.15798	1.08935		116	1.03638	0.925784	0.880783	0.80123	0.826658	0.851593
	120	1.16035	0.871048	1.11974	1.09876	1.244	1.17823	1.10243	1.52695	1.1918	1.06982		120	1.05992	0.949503	0.885806	0.771516	0.776995	0.891499
	124	1.1675	0.865031	1.19503	1.14917	1.22978	1.15295	1.17576	1.41243	1.12018	1.06568		124	1.07808	0.944912	0.838722	0.784836	0.808235	0.810933
	128	1.10555	0.799519	1.19144	1.08842	1.28843	1.1492	1.10002	1.58497	1.09928	1.05148		128	1.107	0.933435	0.827422	0.78791	0.857097	0.828251
	132	1.15916	0.855672	1.28466	1.07032	1.21379	1.15201	1.0844	1.51932	1.07043	1.04497		132	1.10431	0.943382	0.788499	0.781762	0.816245	0.910323
	136	1.17465	0.811552	1.27151	1.10781	1.24756	1.14264	1.16615	1.51932	1.00676	1.03905		136	1.08884	0.918898	0.763388	0.751025	0.818648	0.904299
	140	1.24255	0.83428	1.26076	1.11944	1.22445	1.22132	1.11205	1.71324	0.966972	1.02781		140	1.09153	0.919663	0.821144	0.766393	0.772989	0.834275
	144	1.10555	0.808878	1.299	1.11298	1.22445	1.17355	1.14931	1.57734	0.908277	1.01124		144	1.08615	0.943382	0.780338	0.72541	0.84348	0.898276
	148	1.15797	0.784812	1.16635	1.091	1.31687	1.17636	1.20462	1.61093	1.26542	1.09586		148	1.10969	0.951798	0.740787	0.785861	0.878725	0.970559
	152	1.20086	0.81222	1.22371	1.13625	1.24933	1.21289	2.0642	1.64453	1.153	1.09053		152	1.08212	0.934966	0.775315	0.782787	0.888337	0.890746
	156	1.15916	0.809546	1.18188	1.17632	1.21734	1.1876	1.93556	1.53306	1.12415	1.11598		156	1.07203	0.924254	0.743926	0.807377	0.90596	0.855357
	160	1.16631	0.820242	1.15081	1.15564	1.29021	1.16044	1.78288	1.57581	1.20971	1.10828		160	1.07943	0.928845	0.736393	0.759221	0.881929	0.952489
	164	1.17941	0.791497	1.14962	1.13366	1.29199	1.12672	1.78288	1.54833	1.18782	1.08817		164	1.08346	0.933435	0.823027	0.775615	0.906761	0.972818
	168	1.14367	0.814894	1.27749	1.13366	1.30443	1.12204	1.9043	1.60788	1.19976	1.08343		168	1.08884	0.92808	0.855672	0.742828	0.811439	0.90957
	172	1.14725	0.845645	1.16157	1.15822	1.21912	1.16044	1.50637	1.56971	1.08038	1.09172		172	1.07136	0.957919	0.698726	0.765369	0.798622	0.972818
	176	1.21873	0.852998	1.20817	1.11298	1.25289	1.11361	1.54244	1.5865	1.26343	1.10533		176	1.07875	0.976282	0.745182	0.790984	0.837872	0.970559
	180	1.12104	0.852998	1.20578	1.13366	1.30443	1.20352	2.34071	1.59566	1.19678	1.06686		180	1.07741	0.946442	0.742043	0.775615	0.82025	0.90957
	184	1.14844	0.8169	1.20817	1.34049	1.30265	1.19041	1.88146	1.6827	1.26144	1.08757		184	1.08548	0.92961	0.767782	0.717213	0.817847	0.92237
	188	1.19014	0.828932	1.23566	1.20346	1.25467	1.13234	1.78649	1.69644	1.27537	1.06568		188	1.12449	0.89977	0.73137	0.754098	0.857097	1.00595
	192	1.13891	0.794839	1.14125	1.20993	1.37196	1.25784	1.95961	1.65521	1.29029	1.07515		192	1.10835	0.904361	0.771549	0.755123	0.809036	0.958512
	196	1.25566	0.808209	1.33485	1.18795	1.3222	1.21476	1.66987	1.62009	1.22762	1.01953		196	1.09826	0.937261	0.806705	0.777664	0.813842	1.02703
	200	1.19252	0.841634	1.42567	1.2319	1.36663	1.21944	1.66987	1.6262	1.24055	1.0574		200	1.07674	0.904361	0.738276	0.767418	0.857097	1.00369

## Sheet: Figure 2E
c587>LacZ-RNAi; Gcamp6s, turbo::RFP	t (seconds)	sample1	sample2	sample3	sample4	sample5	sample6	sample7	sample8	sample9	c587>Oamb-RNAi1; Gcamp6s, turbo::RFP	t (seconds)	sample1	sample2	sample3	sample4	sample5	sample6	sample7
Relative GCaMP6s fluorecence (normalized by mean of the values from t=-36 to t=0) (Octopamine was administraed at t=0)	-36	0.848324	1.01509	1.12361	1.1703	0.9323	1.03873	1.04907	0.997588	0.980556	Relative GCaMP6s fluorecence (normalized by mean of the values from t=-36 to t=0) (Octopamine was administraed at t=0)	-36	1.02411	0.974026	1.00417	0.894052	1.02532	0.900463	1.02549
	-32	0.88752	0.994969	0.821947	1.16051	0.995686	1.0446	0.978851	0.976688	0.986397		-32	0.990469	0.975108	0.971683	0.936696	1.05983	0.954861	1.04074
	-28	0.89382	1.01006	0.653773	1.17729	1.00625	1.05732	0.97718	1.00965	0.988901		-28	0.977387	0.964286	0.953323	0.989633	0.995378	0.980324	0.987
	-24	0.944915	0.934591	0.984864	0.787192	0.97984	1.00254	0.93622	0.96463	0.986397		-24	0.99701	1.0119	0.958972	1.03816	0.996029	1.02431	0.989179
	-20	1.0562	1.02264	1.09313	0.81236	1.04411	1.03189	1.06411	1.01527	0.996412		-20	0.986731	1.01082	0.986512	1.04625	1.00189	1.0625	1.0284
	-16	1.03521	1.02013	1.10889	0.908837	1.03354	0.951682	0.99139	1.02331	1.01978		-16	1.00449	0.982684	0.963915	1.04625	0.973244	1.00694	1.00661
	-12	1.1129	1.00126	1.03637	0.746644	0.970156	1.01428	0.967149	1.0426	1.0106		-12	1.01009	1.00541	1.01688	1.10065	1.02597	1.02778	0.979737
	-8	1.0821	1.05031	1.08997	1.08501	0.972797	0.977113	1.00142	1.00482	1.0106		-8	1.00729	1.03247	1.02253	1.01537	1.00579	0.957176	0.976832
	-4	1.04851	0.987421	1.06475	1.10319	1.05995	0.941901	1.00978	1.0217	1.0323		-4	0.989535	1.0184	1.0536	1.0036	0.959573	1.04977	0.979737
	0	1.0905	0.963522	1.0227	1.04866	1.00537	0.939945	1.02483	0.94373	0.988066		0	1.01289	1.02489	1.06843	0.929343	0.956969	1.03588	0.986274
	4	0.826626	1.04906	1.08262	1.29055	1.0846	1.24707	1.00727	0.980707	0.99057		4	1.15212	0.996753	1.16305	0.989633	1.08847	0.982639	0.968117
	8	1.1136	1.1673	1.03742	1.22903	1.11101	1.01232	1.21374	0.969453	1.02145		8	1.12876	1.00649	1.18848	0.961694	1.08066	0.946759	0.947055
	12	1.29558	1.1673	0.89342	1.17729	1.11277	1.10818	1.21458	1.04904	1.08404		12	1.11848	0.996753	0.998517	0.992574	1.07675	0.958333	0.956496
	16	1.22069	1.11698	1.03321	1.23462	1.10045	1.13067	1.25972	1.10209	1.0807		16	1.15399	1.04004	1.00205	1.00801	1.03574	0.951389	0.98119
	20	1.33268	1.12453	1.27601	1.24021	1.06964	1.03971	1.23798	1.11576	1.07903		20	1.16894	1.02814	1.01758	1.02713	0.986915	0.975694	0.981916
	24	1.25989	1.10692	1.22346	1.41079	1.08108	1.04754	1.20538	1.09646	1.08654		24	1.12315	1.00974	1.02676	1.01463	0.943949	0.939815	0.974653
	28	1.31168	1.11698	1.09733	1.45134	1.06788	1.14926	1.17028	1.09646	1.08654		28	1.13343	1.0303	1.03312	0.973458	0.986915	0.922454	0.928898
	32	1.27319	1.07044	1.08262	1.38563	1.08812	1.09644	1.1569	1.11656	1.10657		32	1.10634	1.0368	1.02606	0.955077	1.00775	0.925926	0.931077
	36	1.37398	1.08931	1.05739	1.39961	1.08812	1.06808	1.22043	1.07395	1.07736		36	1.14465	1.05195	1.03665	0.980075	0.988868	0.915509	0.891859
	40	1.41737	1.14717	1.03637	1.23462	1.05467	1.06416	1.15272	1.04984	1.03313		40	1.10447	1.07359	1.03383	0.978605	1.02923	0.947917	0.99862
	44	1.42577	1.08679	1.04373	1.20666	1.01505	1.1385	1.2104	1.02733	1.11658		44	1.15025	1.05844	1.06984	0.982281	0.979103	0.923611	0.949234
	48	1.51536	1.13836	1.03742	1.23182	1.04939	1.10426	1.22461	1.12058	1.08487		48	1.17455	1.09199	1.10374	0.966105	0.975848	0.947917	0.991357
	52	1.51186	1.07925	1.06475	1.45833	1.09605	1.13556	1.17028	1.08119	1.0373		52	1.14558	1.079	1.09102	0.977134	0.951761	0.943287	0.942697
	56	1.45727	1.09434	1.19403	1.44435	1.11189	1.10231	1.12848	1.09486	1.10573		56	1.11942	1.06926	1.07055	0.966841	0.941996	1.03125	0.944876
	60	1.43977	1.06792	1.2098	1.44435	1.08284	1.06905	1.20789	1.04019	1.18167		60	1.11568	1.0974	1.09738	0.985957	0.946553	1.05093	0.96158
	64	1.41317	1.0805	1.13622	1.39402	1.07492	1.04754	1.21207	1.04502	1.10991		64	1.11381	1.10606	1.07337	0.972723	0.960875	0.997685	0.976832
	68	1.45097	1.13585	1.07946	1.52265	1.07668	1.08862	1.24634	1.1037	1.09906		68	1.1026	1.12121	1.08326	0.94993	0.938741	1.02199	0.957223
	72	1.41317	1.3283	1.11625	1.54223	1.12158	1.05536	1.21876	1.10772	1.05316		72	1.1026	1.11039	1.09597	0.931549	0.962177	1.02662	0.976106
	76	1.32358	1.31824	1.0679	1.18149	1.09693	1.08862	1.21792	1.13826	1.1074		76	1.12409	1.10498	1.11292	0.953606	0.934184	0.987269	0.966664
	80	1.28648	1.32453	1.03847	1.33389	1.09957	1.12285	1.27727	1.09727	1.10406		80	1.09138	1.12662	1.08184	0.971987	0.975197	1	0.990631
	84	1.27249	1.29057	1.09838	1.33529	1.03882	1.11405	1.29232	1.12299	1.1049		84	1.1054	1.1342	0.981569	1.02051	0.969989	0.984954	1.00443
	88	1.34668	1.28428	1.11625	1.30593	1.05115	1.17077	1.30987	1.14711	1.11491		88	1.11194	1.11255	0.972389	0.997721	0.947855	0.982639	1.0008
	92	1.29908	1.36352	1.24658	1.40101	1.0397	1.08764	1.25637	1.12942	1.11408		92	1.14932	1.11364	0.981569	1.00287	0.982358	0.996528	0.987
	96	1.32008	1.32327	1.25079	1.33249	1.0353	1.12969	1.21709	1.1045	1.10073		96	1.14558	1.12987	0.958266	0.998456	0.946553	0.996528	0.952865
	100	1.25499	1.24528	1.18667	1.23742	1.05643	1.30771	1.2965	1.14148	1.1074		100	1.09232	1.13203	0.947673	1.0036	0.954365	1.01273	0.976106
	104	1.25499	1.33459	1.12781	1.27796	1.04675	1.25293	1.22043	1.09646	1.08988		104	1.08858	1.11364	0.968152	1.02566	0.966734	0.927083	0.921636
	108	1.28228	1.34214	1.09102	1.25839	1.0802	1.20012	1.14603	1.14952	1.12242		108	1.06055	1.13312	0.918014	1.05139	0.917258	0.981481	0.952139
	112	1.25429	1.25786	1.08156	1.25979	1.06611	1.14926	1.19117	1.09727	1.08988		112	1.06429	1.15584	0.930725	1.0014	0.928325	1.0081	0.951413
	116	1.21439	1.30566	1.10469	1.44016	1.05555	1.23044	1.243	1.20177	1.11408		116	1.08952	1.17208	0.946261	1.02125	0.935486	0.965278	0.965212
	120	1.31938	1.31824	1.0637	1.41779	1.05203	1.24609	1.23297	1.15997	1.11408		120	1.11101	1.12987	0.950498	0.980075	0.914003	0.94213	0.962307
	124	1.27599	1.30566	1.12781	1.43037	1.00009	1.25782	1.2338	1.17042	1.09739		124	1.12783	1.11905	0.809971	0.974928	0.921815	0.952546	0.986274
	128	1.24379	1.37736	1.11415	1.54782	0.978959	1.2989	1.27978	1.11897	1.12159		128	1.06896	1.13095	0.814208	0.99478	0.91205	0.954861	1.00588
	132	1.20039	1.30818	1.12256	1.55062	0.971917	1.27445	1.27309	1.16318	1.12993		132	1.08578	1.17641	0.99428	0.970517	0.922466	1.01042	1.0146
	136	1.26129	1.37233	1.1131	1.68624	0.969275	1.2412	1.37089	1.18248	1.18167		136	1.12035	1.17749	0.914483	0.991104	0.951761	1.0706	1.01387
	140	1.1388	1.35472	1.1131	1.47092	0.986883	1.18838	1.42105	1.09405	1.17583		140	1.03906	1.1645	0.942024	1.01978	0.923117	1.06829	0.963033
	144	1.17659	1.3673	1.10364	1.25979	1.00273	1.20892	1.3851	1.19132	1.17333		144	1.08204	1.14394	0.942024	1.04184	0.935486	1.07986	1.02041
	148	1.18779	1.33836	1.13517	1.07662	0.9816	1.3928	1.34832	1.12138	1.19169		148	1.03719	1.14502	0.927194	1.0036	0.927674	1.14815	0.996441
	152	1.21719	1.32579	1.37376	1.27377	0.936702	1.30575	1.33495	1.15113	1.18585		152	1.09512	1.14719	0.927194	1.03007	0.937439	1.10648	0.985547
	156	1.18709	1.32579	1.12676	1.28915	0.940224	1.22946	1.32659	1.19051	1.15998		156	1.07363	1.15152	0.968152	1.03375	0.949157	1.10301	0.952865
	160	1.21159	1.35094	1.24553	1.35626	0.927899	1.23239	1.44613	1.12138	1.04565		160	1.04186	1.16234	0.973095	1.02934	0.938741	1.12037	0.994262
