# Supplementary material for: Neuronal octopamine signaling regulates mating-induced germline stem cell increase in female Drosophila melanogaster
Source: eLife. 2020 Oct 20;9:e57101. doi: 10.7554/eLife.57101 (PMC7591258; doi:10.7554/eLife.57101)
Supplement: Source data 4. — Raw data of the GCaMPs signal intensity for Figure 2. [file elife-57101-data4.xlsx]

## Sheet: Figure 5H, 5L
genotype	Tdc2>TRIC
mating	virgin			mated
Tdc2 neuronal cluster	Tdc2 caudal cluster	Tdc2 dorsal cluster	Tdc2 median cluster	Tdc2 caudal cluster	Tdc2 dorsal cluster	Tdc2 median cluster
Relative fluorecent intensity (GFP/RFP)	0.629607	1.54283	3.29973	1.60619	1.64322	1.3493
	0.642669	1.45398	2.28	2.13414	1.7095	2.07318
	0.586964	0.903507	1.30339	1.36756	1.70846	3.33932
	0.632238	1.34612	2.15291	3.6638	2.86168	4.94465
	0.956493	1.64354	3.69285	1.02702	2.48432	3.46352
	0.682053	1.14016	1.56281	0.973842	1.7224	2.12402
	0.613446	1.33534	1.07499	1.30318	1.37174	1.33898
	0.609168	2.20918	1.59234	1.27314	1.46369	1.31621
	0.509734	1.20167	1.31455	0.815644	1.21171	2.18678
	0.864418	1.66744	1.62338	1.30621	1.35438	3.15434
	p Value		statistical test used	n value
	Tdc2 caudal cluster	4.33e-05	Wilcoxon sum rank test	n=10
	Tdc2 dorsal cluster	0.315
	Tdc2 median cluster	0.08921
